# Supplementary material
Source: PubMed Central journal article supplement (PMC6061978)

# Males

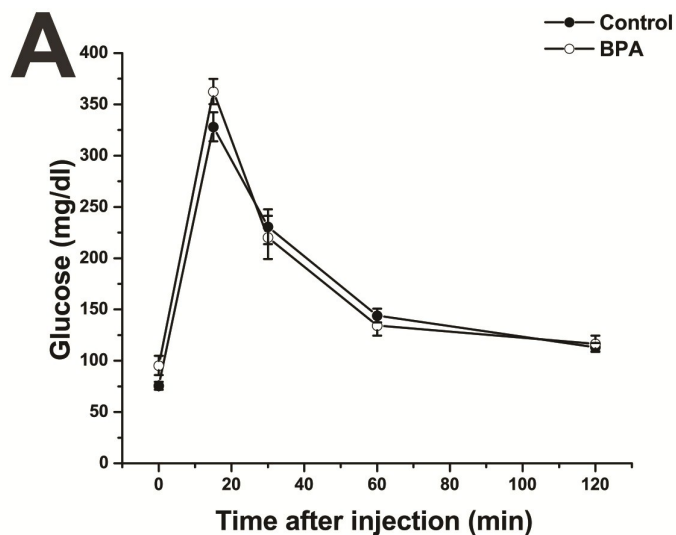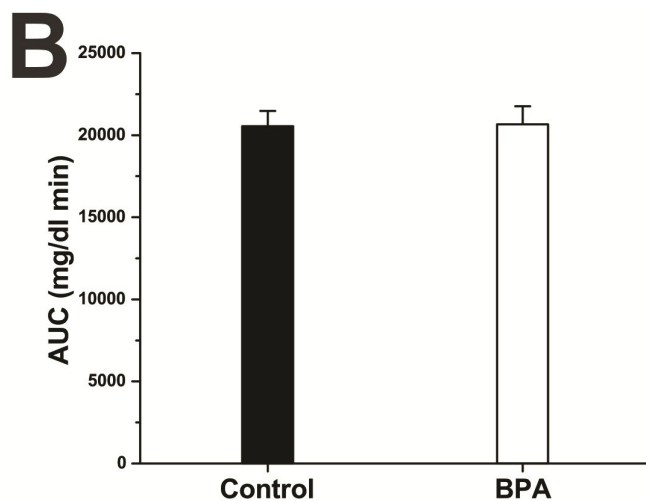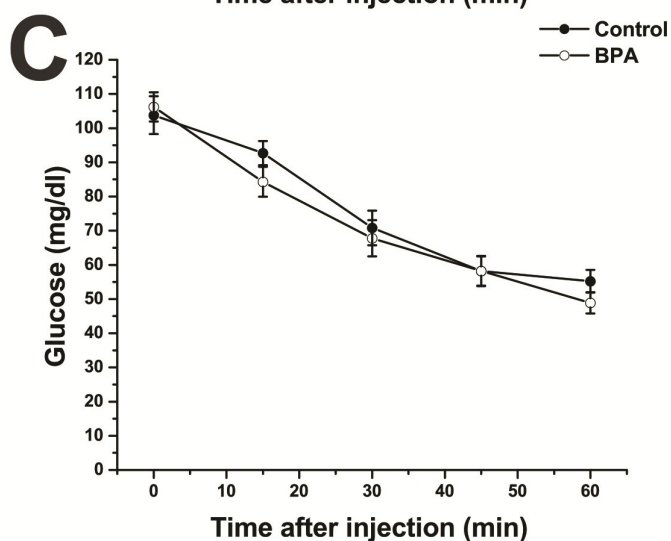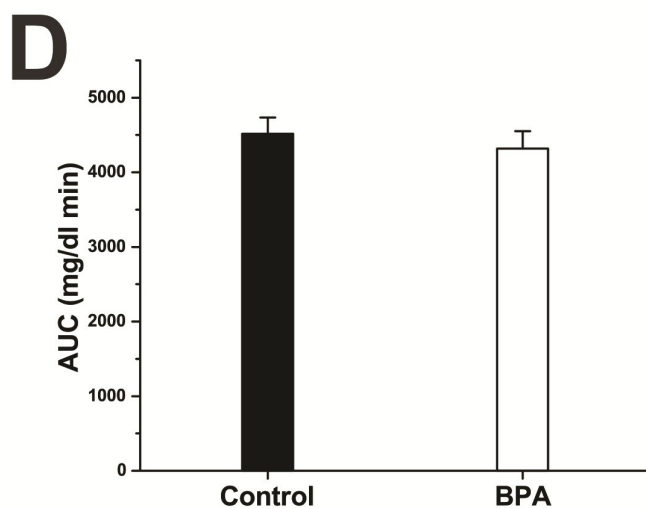

# Females

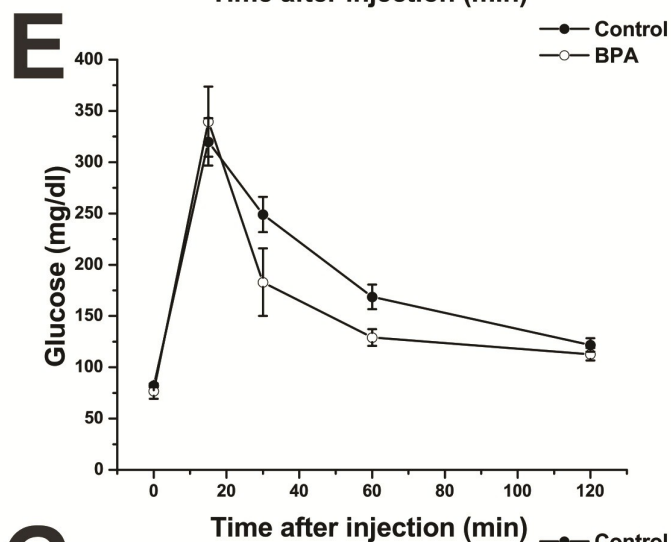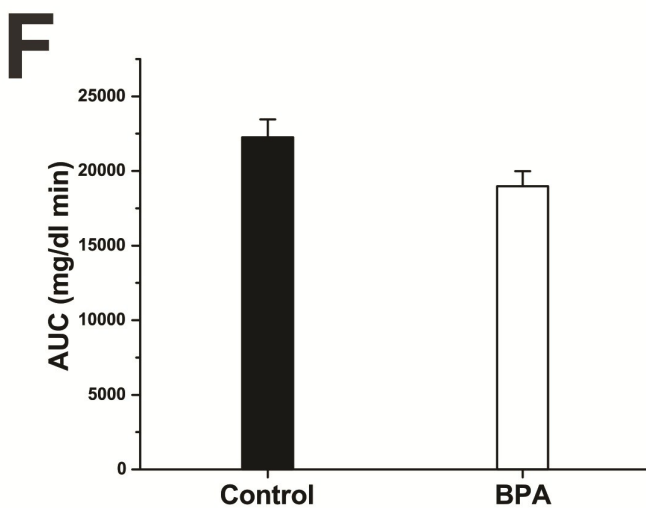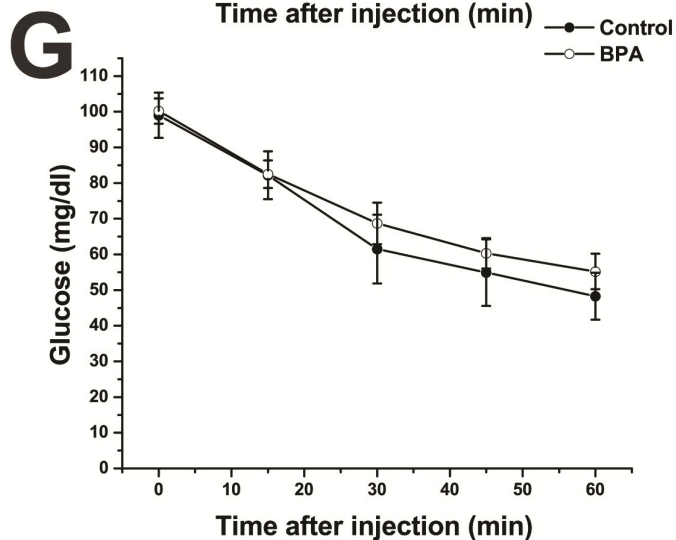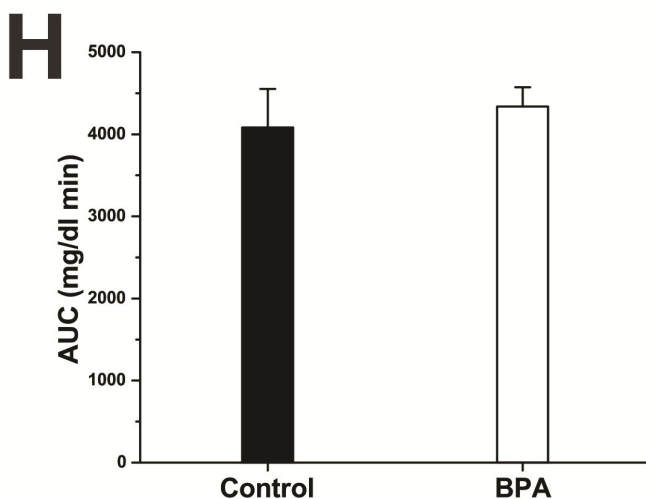

Supplement: TX-005-C6TX00047A-s002.pdf [file TX-005-C6TX00047A-s002.pdf]

# Males

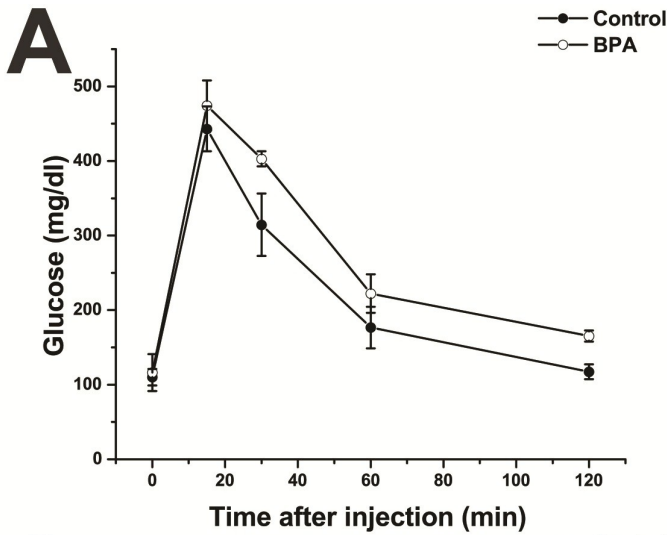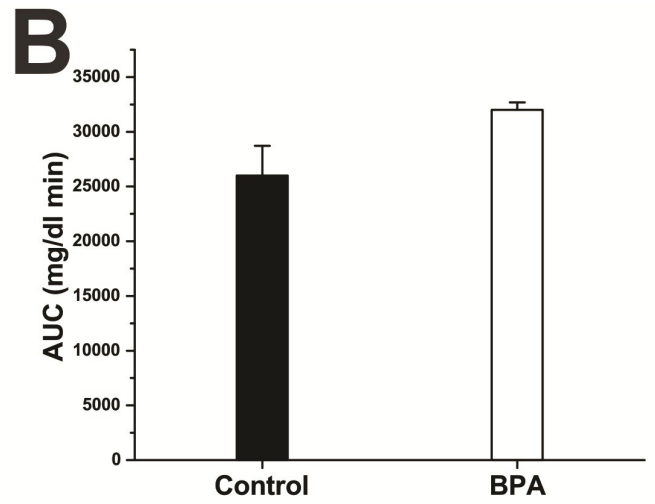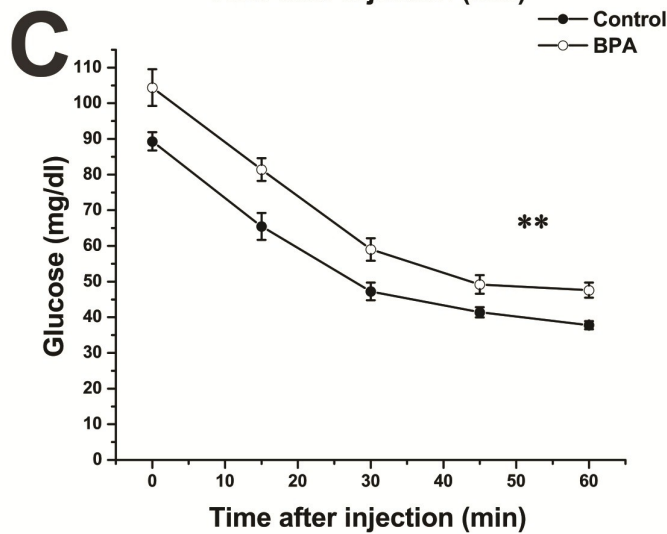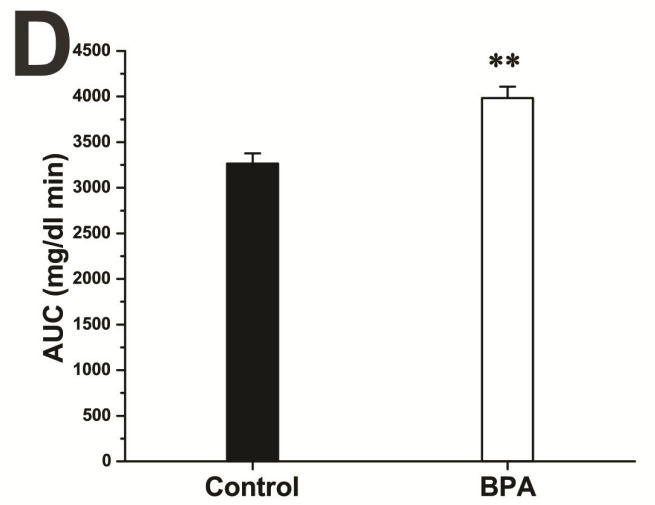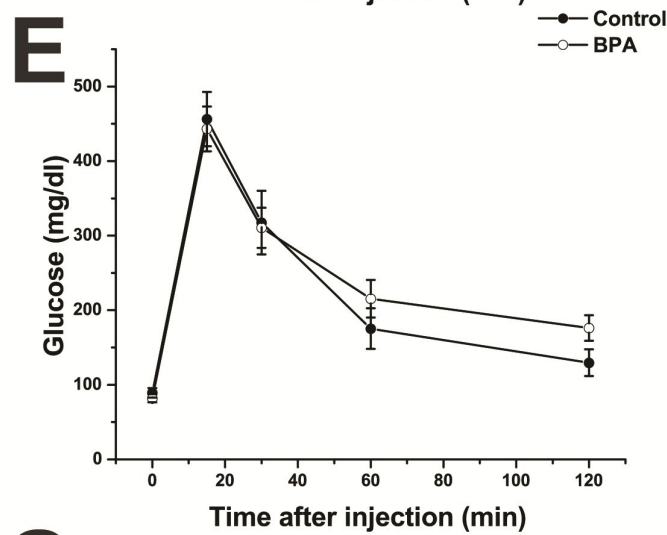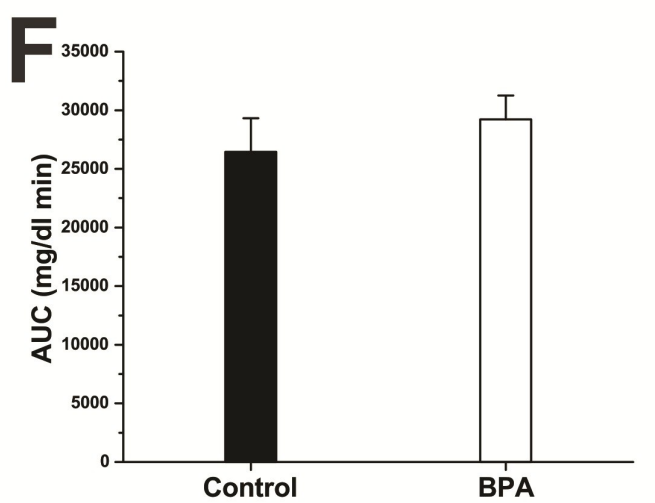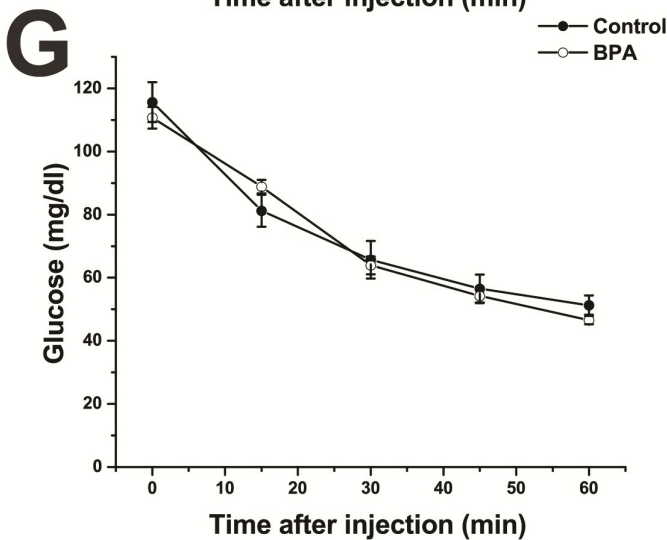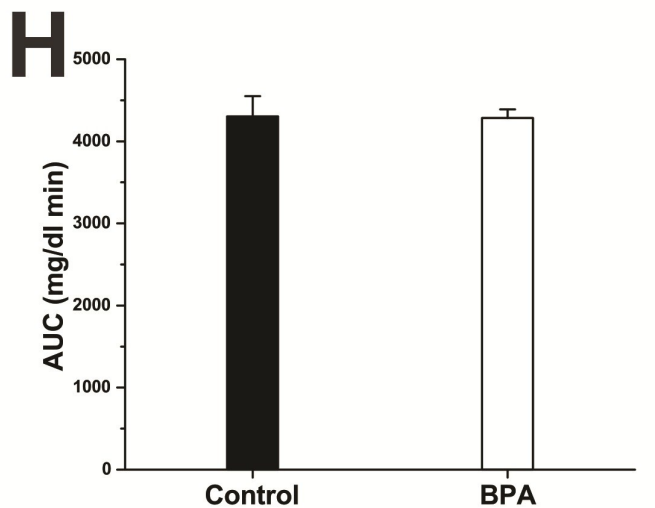

# Females

Supplement: TX-005-C6TX00047A-s003.pdf [file TX-005-C6TX00047A-s003.pdf]

# Males

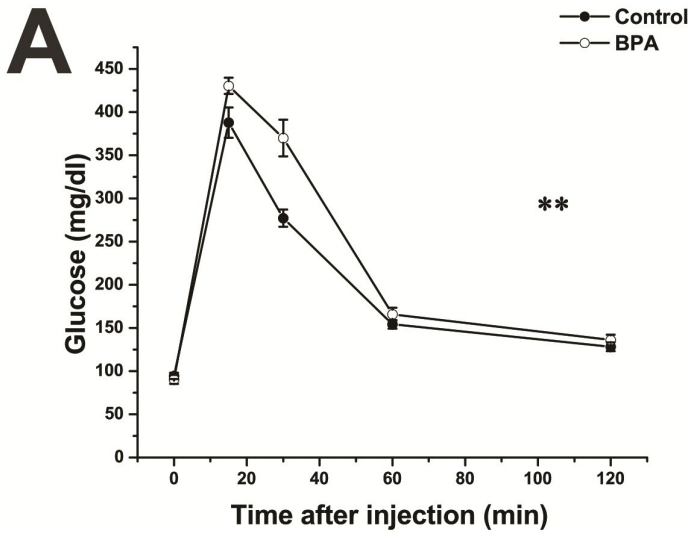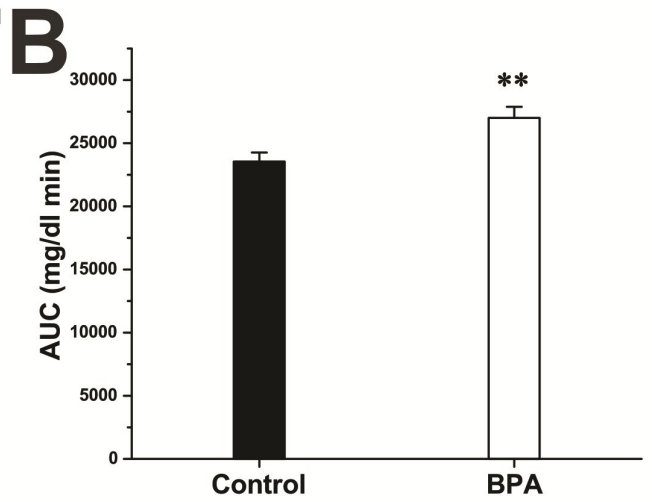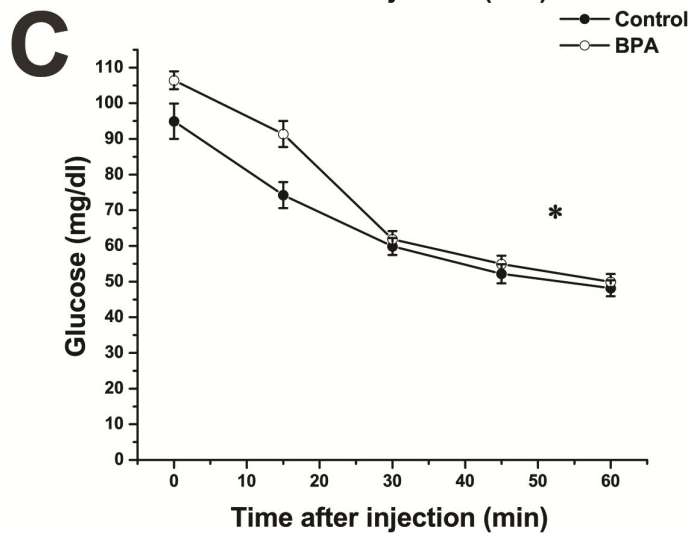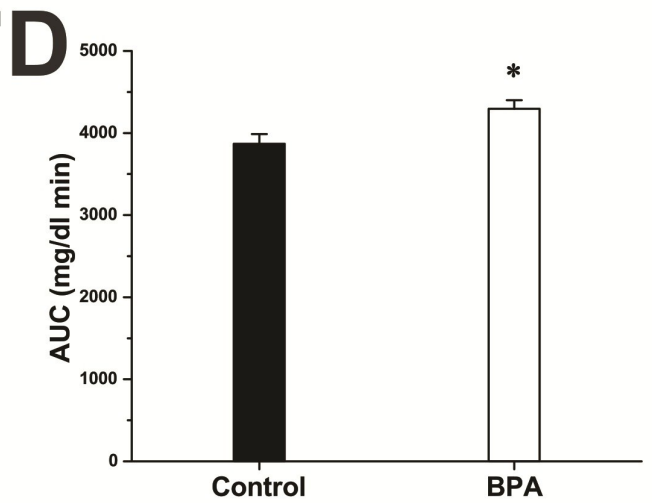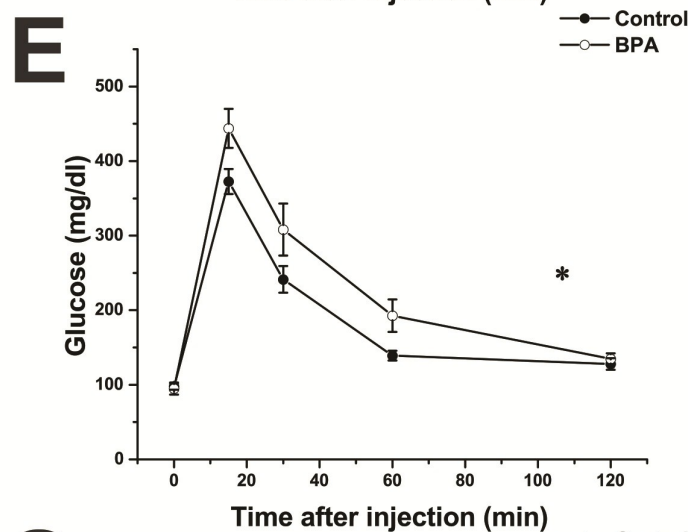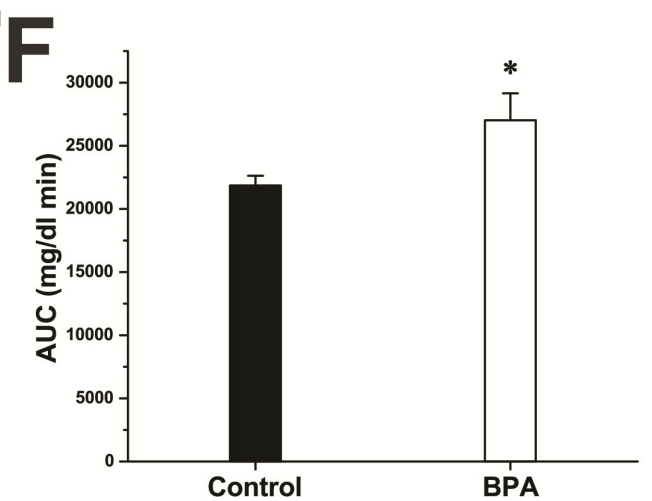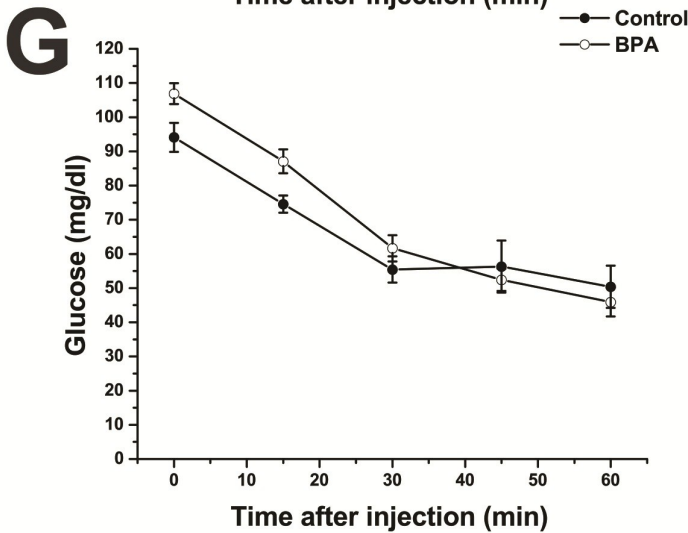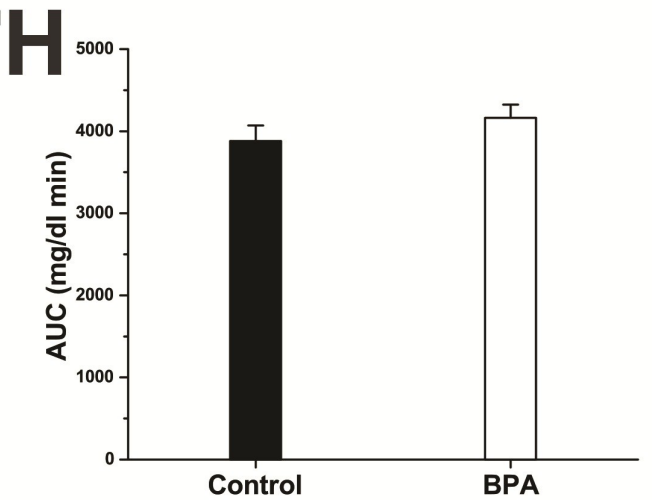

# Females

Supplement: TX-005-C6TX00047A-s004.pdf [file TX-005-C6TX00047A-s004.pdf]
